# Supplementary material for: Precision Diagnostics by Affinity-Mass Spectrometry: A Novel Approach for Fetal Growth Restriction Screening during Pregnancy
Source: PubMed Central journal article supplement (PMC7290972; doi:10.3390/jcm9051374), 2020-05-07
Supplement: jcm-09-01374-s001.pdf [file jcm-09-01374-s001.pdf]

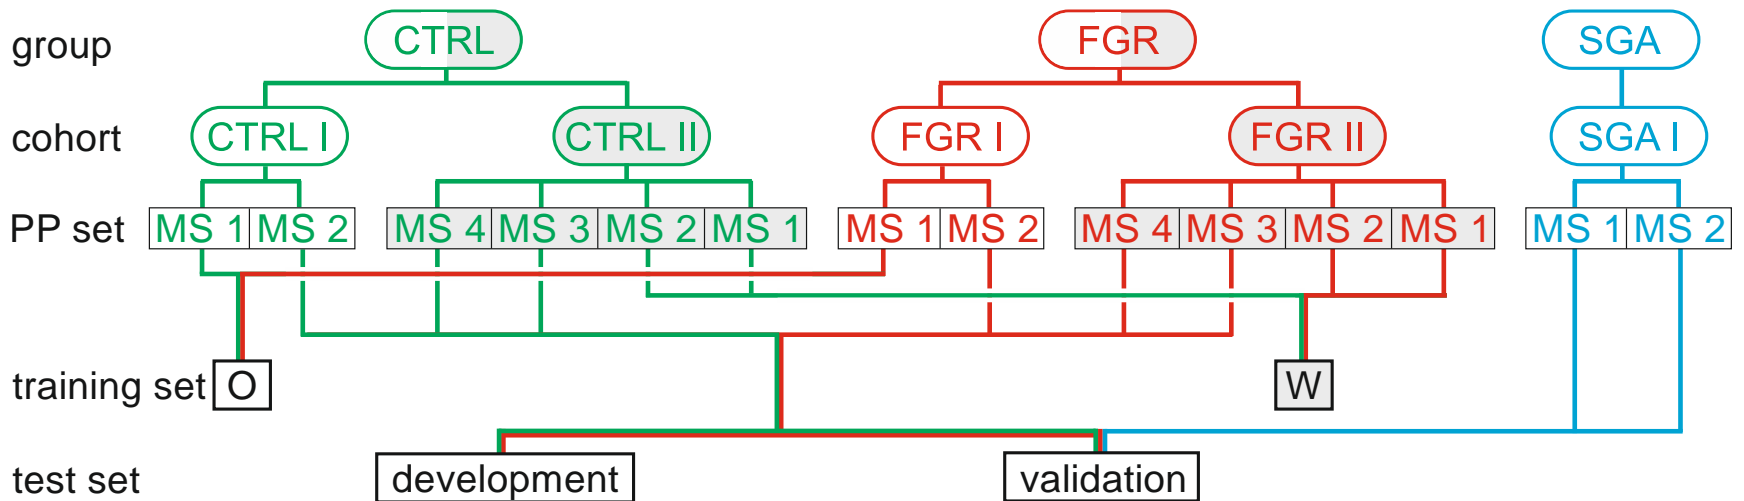

**Supplemental Scheme 1:** The three disease / control groups are represented by five patient cohorts. Individuals for cohorts CTRL I, FGR I, and SGA I have been recruited for this study, whereas cohorts CTRL II and FGR II consisted of individuals which were included in a previous study as well . The training sets “O” (this study) and “W” (from ) were both used for determining cut-off values and the “development” test set for estimating assay performance. With the “validation” test set was investigated the assay’s capability to separate SGA from FGR in the presence of CTRL samples.

**Supplemental Table 1: Demographic Data, Clinical and Laboratory Parameters for all Patients and Control Individuals**

|                   | mothers              |                   |                          |                      |                                              |                                      |                              |                        |                                                            |                                                 | infants         |                                |                  |                         |     |
|-------------------|----------------------|-------------------|--------------------------|----------------------|----------------------------------------------|--------------------------------------|------------------------------|------------------------|------------------------------------------------------------|-------------------------------------------------|-----------------|--------------------------------|------------------|-------------------------|-----|
|                   | patient / individual | age <sup>a)</sup> | BMI [kg/m <sup>2</sup> ] | parity <sup>a)</sup> | median blood pressure <sup>a,b)</sup> [mmHg] | proteinuria [mg/l] <sup>a,c,d)</sup> | smoking status <sup>e)</sup> | co-morb. <sup>f)</sup> | gestational age at collection of blood [w+d] <sup>g)</sup> | gestational age at delivery [w+d] <sup>g)</sup> | $\Delta d^{h)}$ | mode of delivery <sup>i)</sup> | birth weight [g] | birth weight percentile | sex |
| CTRL I            | 101                  | 35.0              | 20.4                     | 0                    | 108 / 60                                     | 0                                    | 0                            | /                      | 29 + 4                                                     | 39 + 2                                          | 68              | s.c.                           | 3210             | 40                      | f   |
|                   | 102                  | 23.6              | 22.0                     | 0                    | 102 / 54                                     | 0                                    | 0                            | /                      | 30 + 6                                                     | 41 + 2                                          | 73              | vaginal                        | 3765             | 50                      | m   |
|                   | 103                  | 28.9              | 20.3                     | 0                    | 120 / 60                                     | 0                                    | 0                            | /                      | 32 + 4                                                     | 41 + 4                                          | 63              | vaginal                        | 3580             | 50                      | f   |
|                   | 104                  | 21.5              | 23.9                     | 1                    | 115 / 60                                     | 0                                    | 20                           | /                      | 30 + 4                                                     | 37 + 6                                          | 51              | s.c.                           | 3200             | 43                      | m   |
|                   | 105                  | 31.7              | 23.9                     | 1                    | 110 / 70                                     | 0                                    | 0                            | /                      | 28 + 5                                                     | 40 + 0                                          | 79              | vaginal                        | 3690             | 60                      | m   |
|                   | 106                  | 28.9              | 22.2                     | 0                    | 122 / 68                                     | 0                                    | 0                            | /                      | 31 + 6                                                     | 39 + 0                                          | 50              | vaginal                        | 3420             | 60                      | f   |
|                   | 107                  | 39.2              | 21.1                     | 1                    | 127 / 61                                     | 0                                    | 0                            | /                      | 31 + 3                                                     | 39 + 0                                          | 53              | vaginal                        | 3440             | 60                      | f   |
|                   | 108                  | 32.0              | 24.1                     | 0                    | 130 / 80                                     | 0                                    | 0                            | /                      | 30 + 4                                                     | 39 + 3                                          | 62              | vaginal                        | 3050             | 20                      | f   |
|                   | 109                  | 25.1              | 26.9                     | 0                    | 99 / 87                                      | 0                                    | 0                            | /                      | 27 + 6                                                     | 37 + 3                                          | 67              | vaginal                        | 2960             | 30                      | m   |
|                   | 110                  | 29.3              | 23.5                     | 0                    | 135 / 70                                     | 0                                    | 0                            | /                      | 28 + 4                                                     | 39 + 1                                          | 74              | s.c.                           | 3450             | 50                      | m   |
|                   | 111                  | 31.2              | 23.2                     | 1                    | 116 / 81                                     | 0                                    | 0                            | /                      | 28 + 0                                                     | 41 + 0                                          | 91              | vaginal                        | 3750             | 70                      | f   |
|                   | 112                  | 26.6              | 19.5                     | 0                    | 100 / 80                                     | 0                                    | 0                            | /                      | 30 + 2                                                     | 39 + 4                                          | 65              | vaginal                        | 3660             | 60                      | m   |
|                   | 113                  | 24.5              | 22.4                     | 1                    | 115 / 59                                     | 0                                    | 2                            | /                      | 26 + 2                                                     | 38 + 2                                          | 84              | vaginal                        | 2970             | 30                      | f   |
|                   | 114                  | 38.2              | 25.5                     | 1                    | 130 / 80                                     | 0                                    | 0                            | /                      | 25 + 5                                                     | 40 + 5                                          | 105             | vaginal                        | 3765             | 70                      | f   |
| 115 <sup>j)</sup> | 25.7                 | 23.1              | 1                        | 105 / 63             | 0                                            | 25                                   | /                            | 28 + 4                 | 40 + 4                                                     | 84                                              | vaginal         | 3070                           | 14               | f                       |     |
| CTRL II           | 151                  | 24.9              | 20.3                     | 2                    | 109 / 53                                     | 0 <sup>f</sup>                       | 20                           | /                      | 27+0                                                       | 27+4                                            | 4               | s.c.                           | 1355             | 85                      | m   |
|                   | 152                  | 37.9              | 23.1                     | 2                    | 108 / 65                                     | 0 <sup>f</sup>                       | 0                            | /                      | 27+1                                                       | 27+4                                            | 3               | s.c.                           | 1095             | 40                      | m   |
|                   | 153                  | 30.5              | 22.1                     | 0                    | 114 / 61                                     | 0 <sup>f</sup>                       | 0                            | /                      | 25+0                                                       | 25+0                                            | 0               | vaginal                        | 740              | 30                      | m   |
|                   | 154                  | 30.3              | 20.8                     | 1                    | 124 / 69                                     | 0 <sup>f</sup>                       | 0                            | /                      | 31+2                                                       | 33+6                                            | 18              | s.c.                           | 1960             | 25                      | f   |
|                   | 155                  | 29.9              | 21.4                     | 0                    | 114 / 71                                     | 150                                  | 0                            | /                      | 32+0                                                       | 32+1                                            | 1               | s.c.                           | 1920             | 50                      | m   |
|                   | 156                  | 24.2              | 35.7                     | 0                    | 129 / 73                                     | 0 <sup>f</sup>                       | 10                           | /                      | 31+6                                                       | 31+6                                            | 0               | vaginal                        | 1750             | 50                      | f   |
|                   | 157                  | 32.1              | 22.4                     | 0                    | 126 / 63                                     | 0 <sup>f</sup>                       | 0                            | /                      | 37+4                                                       | 37+4                                            | 0               | s.c.                           | 3130             | 50                      | f   |
|                   | 158                  | 31.8              | 25.8                     | 1                    | 121 / 75                                     | 0 <sup>f</sup>                       | 0                            | /                      | 37+5                                                       | 37+5                                            | 0               | s.c.                           | 3465             | 70                      | m   |
|                   | 159                  | 35.7              | 21.8                     | 1                    | 122 / 58                                     | 0 <sup>f</sup>                       | 0                            | /                      | 33+6                                                       | 34+6                                            | 7               | s.c.                           | 2420             | 40                      | f   |
|                   | 160                  | 37.1              | 19.1                     | 1                    | 120 / 60                                     | 0 <sup>f</sup>                       | 0                            | /                      | 38+6                                                       | 39+0                                            | 1               | s.c.                           | 3150             | 30                      | f   |
|                   | 161                  | 40.0              | 20.8                     | 1                    | 110 / 60                                     | 0 <sup>f</sup>                       | 0                            | /                      | 36+0                                                       | 36+0                                            | 0               | s.c.                           | 2920             | 60                      | m   |
|                   | 162                  | 32.7              | 25.1                     | 2                    | 110 / 70                                     | 0 <sup>f</sup>                       | 0                            | /                      | 32+3                                                       | 32+3                                            | 0               | s.c.                           | 1850             | 50                      | f   |
|                   | 163                  | 29.6              | 24.1                     | 1                    | 106 / 61                                     | 0 <sup>f</sup>                       | 0                            | /                      | 27+5                                                       | 28+4                                            | 6               | s.c.                           | 1250             | 60                      | f   |
|                   | 164                  | 24.6              | 17.6                     | 1                    | 110 / 54                                     | 0 <sup>f</sup>                       | 5                            | /                      | 28+0                                                       | 28+0                                            | 0               | s.c.                           | 1030             | 40                      | f   |
| 165               | 24.7                 | 35.4              | 1                        | 120 / 81             | 0 <sup>f</sup>                               | 0                                    | /                            | 39+2                   | 39+2                                                       | 0                                               | s.c.            | 3895                           | 80               | m                       |     |

Supplemental Table 1 (continued)

|         | mothers              |                   |                          |                      |                                              |                                      |                              |                        |                                                            |                                                 |                 | infants                        |                  |                         |     |
|---------|----------------------|-------------------|--------------------------|----------------------|----------------------------------------------|--------------------------------------|------------------------------|------------------------|------------------------------------------------------------|-------------------------------------------------|-----------------|--------------------------------|------------------|-------------------------|-----|
|         | patient / individual | age <sup>a)</sup> | BMI [kg/m <sup>2</sup> ] | parity <sup>a)</sup> | median blood pressure <sup>a,b)</sup> [mmHg] | proteinuria [mg/l] <sup>a,c,d)</sup> | smoking status <sup>e)</sup> | co-morb. <sup>f)</sup> | gestational age at collection of blood [w+d] <sup>g)</sup> | gestational age at delivery [w+d] <sup>g)</sup> | $\Delta d^{h)}$ | mode of delivery <sup>i)</sup> | birth weight [g] | birth weight percentile | sex |
| IUGR I  | 301                  | 41.8              | 23.7                     | 3                    | 134 / 78                                     | 0                                    | 0                            | /                      | 33 + 6                                                     | 34 + 1                                          | 2               | s.c.                           | 1525             | 3                       | m   |
|         | 302                  | 34.9              | 19.9                     | 0                    | 130 / 82                                     | 0                                    | 0                            | /                      | 29 + 3                                                     | 30 + 0                                          | 4               | s.c.                           | 755              | 2                       | m   |
|         | 303                  | 31.9              | 22.5                     | 0                    | 129 / 76                                     | 90                                   | 0                            | /                      | 31 + 0                                                     | 32 + 1                                          | 8               | s.c.                           | 1255             | 9                       | f   |
|         | 304                  | 24.5              | 19.7                     | 0                    | 122 / 53                                     | 0                                    | 40                           | /                      | 26 + 1                                                     | 26 + 4                                          | 3               | s.c.                           | 590              | 3                       | m   |
|         | 305                  | 28.8              | 26.0                     | 1                    | 120 / 80                                     | 0                                    | 15                           | /                      | 30 + 5                                                     | 31 + 5                                          | 7               | s.c.                           | 1190             | 6                       | m   |
|         | 306                  | 27.5              | 22.1                     | 0                    | 130 / 68                                     | 0                                    | 0                            | /                      | 32 + 6                                                     | 33 + 2                                          | 3               | s.c.                           | 1405             | 6                       | f   |
|         | 307                  | 30.7              | 24.0                     | 0                    | 120 / 75                                     | 0                                    | 10                           | /                      | 28 + 1                                                     | 28 + 5                                          | 4               | s.c.                           | 730              | 4                       | f   |
|         | 308                  | 29.4              | 20.1                     | 0                    | 103 / 59                                     | 0                                    | 0                            | /                      | 29 + 6                                                     | 31 + 4                                          | 12              | s.c.                           | 1240             | 9                       | m   |
|         | 309                  | 23.6              | 23.7                     | 0                    | 125 / 71                                     | 101                                  | 10                           | /                      | 30 + 5                                                     | 30 + 5                                          | 0               | s.c.                           | 940              | 4                       | f   |
|         | 310                  | 27.8              | 18.0                     | 1                    | 111 / 64                                     | 0                                    | 3                            | /                      | 27 + 1                                                     | 28 + 6                                          | 12              | s.c.                           | 900              | 8                       | m   |
|         | 311                  | 22.0              | 19.4                     | 0                    | 110 / 60                                     | 0                                    | 0                            | /                      | 25 + 3                                                     | 25 + 6                                          | 3               | s.c.                           | 495              | 3                       | m   |
|         | 312                  | 28.7              | 19.2                     | 0                    | 128 / 76                                     | 0                                    | 0                            | /                      | 28 + 4                                                     | 33 + 0                                          | 31              | s.c.                           | 1245             | 4                       | f   |
|         | 313                  | 23.4              | 23.5                     | 0                    | 96 / 52                                      | 0                                    | 5                            | /                      | 29 + 3                                                     | 29 + 5                                          | 2               | s.c.                           | 855              | 4                       | m   |
|         | 314                  | 23.1              | 29.0                     | 0                    | 109 / 77                                     | 0                                    | 5                            | /                      | 29 + 4                                                     | 29 + 6                                          | 2               | s.c.                           | 860              | 4                       | f   |
|         | 315 <sup>j)</sup>    | 23.4              | 22.7                     | 1                    | 139 / 65                                     | 0                                    | 0                            | /                      | 31 + 2                                                     | 31 + 4                                          | 2               | s.c.                           | 1240             | 9                       | m   |
| IUGR II | 351                  | 31.9              | 22.5                     | 0                    | 129 / 76                                     | 90                                   | 0                            | /                      | 31+0                                                       | 32+1                                            | 8               | s.c.                           | 1255             | 9                       | f   |
|         | 352                  | 23.6              | 23.7                     | 0                    | 125 / 71                                     | 101                                  | 10                           | /                      | 30+5                                                       | 30+5                                            | 0               | s.c.                           | 940              | 4                       | f   |
|         | 353                  | 33.1              | 31.9                     | 0                    | 155 / 100                                    | 2324                                 | 10                           | PE                     | 24+0                                                       | 26+5                                            | 19              | s.c.                           | 650              | 4                       | m   |
|         | 354                  | 25.6              | 26.2                     | 0                    | 83 / 52                                      | 0 <sup>f)</sup>                      | 0                            | /                      | 37+3                                                       | 37+5                                            | 2               | s.c.                           | 2550             | 5                       | m   |
|         | 355                  | 39.6              | 27.1                     | 0                    | 148 / 92                                     | 300                                  | 0                            | PE                     | 28+2                                                       | 28+2                                            | 0               | s.c.                           | 850              | 8                       | m   |
|         | 356                  | 34.3              | 19.9                     | 0                    | 136 / 71                                     | 0 <sup>f)</sup>                      | 0                            | /                      | 32+0                                                       | 32+1                                            | 1               | s.c.                           | 1310             | 8                       | m   |
|         | 357                  | 23.8              | 21.5                     | 0                    | 162 / 100                                    | 500                                  | 0                            | PE                     | 35+5                                                       | 35+5                                            | 0               | s.c.                           | 1330             | 1                       | f   |
|         | 358                  | 27.5              | 22.1                     | 0                    | 130 / 68                                     | 150                                  | 0                            | /                      | 32+6                                                       | 33+2                                            | 3               | s.c.                           | 1405             | 6                       | f   |
|         | 359                  | 19.1              | 23.5                     | 0                    | 116 / 64                                     | 0 <sup>f)</sup>                      | 10                           | /                      | 35+5                                                       | 36+1                                            | 3               | s.c.                           | 1870             | 2                       | m   |
|         | 360                  | 27.8              | 28.3                     | 3                    | 112 / 55                                     | 0 <sup>f)</sup>                      | 0                            | /                      | 27+0                                                       | 27+0                                            | 0               | s.c.                           | 580              | 3                       | f   |
|         | 361                  | 31.7              | 20.2                     | 1                    | 100 / 60                                     | 0 <sup>f)</sup>                      | 0                            | /                      | 38+6                                                       | 39+0                                            | 1               | s.c.                           | 1970             | 1                       | f   |
|         | 362                  | 34.0              | 23.8                     | 2                    | 140 / 90                                     | 1725                                 | 0                            | PE                     | 26+4                                                       | 26+6                                            | 2               | s.c.                           | 490              | 1                       | m   |
|         | 363                  | 25.1              | 22.6                     | 0                    | 122 / 79                                     | 0 <sup>f)</sup>                      | 3                            | /                      | 33+6                                                       | 36+4                                            | 19              | s.c.                           | 1905             | 3                       | f   |
|         | 364                  | 37.9              | 22.1                     | 0                    | 150 / 80                                     | 0 <sup>f)</sup>                      | 0                            | /                      | 40+3                                                       | 40+3                                            | 0               | s.c.                           | 2665             | 2                       | m   |
|         | 365                  | 41.5              | 28.0                     | 0                    | 155/101                                      | 200                                  | 0                            | PE                     | 30+2                                                       | 32+0                                            | 12              | s.c.                           | 975              | 3                       | f   |

**Supplemental Table 1** (continued)

|       | mothers              |                   |                          |                      |                                              |                                      |                              |                        |                                                            |                                                 |                          | infants                        |                  |                         |     |
|-------|----------------------|-------------------|--------------------------|----------------------|----------------------------------------------|--------------------------------------|------------------------------|------------------------|------------------------------------------------------------|-------------------------------------------------|--------------------------|--------------------------------|------------------|-------------------------|-----|
|       | patient / individual | age <sup>a)</sup> | BMI [kg/m <sup>2</sup> ] | parity <sup>a)</sup> | median blood pressure <sup>a,b)</sup> [mmHg] | proteinuria [mg/l] <sup>a,c,d)</sup> | smoking status <sup>e)</sup> | co-morb. <sup>f)</sup> | gestational age at collection of blood [w+d] <sup>g)</sup> | gestational age at delivery [w+d] <sup>g)</sup> | $\Delta d$ <sup>h)</sup> | mode of delivery <sup>i)</sup> | birth weight [g] | birth weight percentile | sex |
| SGA I | 201                  | 17.7              | 21.8                     | 0                    | 109 / 64                                     | 69                                   | 0                            | /                      | 34 + 4                                                     | 37 + 5                                          | 22                       | vaginal                        | 2300             | 3                       | m   |
|       | 202                  | 31.8              | 20.0                     | 2                    | 120 / 80                                     | 84                                   | 0                            | /                      | 32 + 3                                                     | 38 + 3                                          | 42                       | s.c.                           | 2545             | 4                       | f   |
|       | 203                  | 27.2              | 28.1                     | 0                    | 114 / 60                                     | 0                                    | 0                            | /                      | 29 + 5                                                     | 36 + 1                                          | 45                       | s.c.                           | 2000             | 3                       | m   |
|       | 204                  | 25.6              | 16.2                     | 0                    | 138 / 48                                     | 0                                    | 0                            | /                      | 32 + 3                                                     | 38 + 4                                          | 43                       | s.c.                           | 2740             | 6                       | m   |
|       | 205                  | 31.0              | 25.8                     | 0                    | 146 / 84                                     | 0                                    | 15                           | /                      | 31 + 4                                                     | 37 + 5                                          | 43                       | s.c.                           | 2455             | 5                       | f   |
|       | 206                  | 30.5              | 24.5                     | 1                    | 132 / 62                                     | 0                                    | 0                            | /                      | 29 + 5                                                     | 36 + 1                                          | 45                       | s.c.                           | 2040             | 4                       | f   |
|       | 207                  | 21.4              | 25.0                     | 0                    | 104 / 59                                     | 70                                   | 5                            | /                      | 32 + 1                                                     | 40 + 5                                          | 60                       | vaginal                        | 2780             | 3                       | f   |
|       | 208                  | 40.2              | 26.0                     | 1                    | 120 / 75                                     | 0                                    | 0                            | /                      | 32 + 2                                                     | 38 + 2                                          | 42                       | s.c.                           | 2590             | 7                       | f   |
|       | 209                  | 36.6              | 21.9                     | 1                    | 84 / 45                                      | 0                                    | 0                            | /                      | 33 + 6                                                     | 37 + 3                                          | 25                       | s.c.                           | 1950             | 1                       | m   |
|       | 210                  | 19.7              | 18.4                     | 0                    | 104 / 73                                     | 0                                    | 30                           | /                      | 31 + 4                                                     | 38 + 1                                          | 46                       | vaginal                        | 2750             | 8                       | m   |
|       | 211                  | 36.1              | 25.5                     | 5                    | 121 / 73                                     | 0                                    | 0                            | /                      | 32 + 6                                                     | 38 + 3                                          | 39                       | vaginal                        | 2560             | 3                       | m   |
|       | 212                  | 40.2              | 20.6                     | 1                    | 117 / 70                                     | 0                                    | 0                            | /                      | 30 + 1                                                     | 37 + 2                                          | 50                       | s.c.                           | 2560             | 9                       | m   |
|       | 213                  | 27.0              | 21.1                     | 0                    | 110 / 70                                     | 0                                    | 0                            | /                      | 22 + 6                                                     | 37 + 6                                          | 105                      | s.c.                           | 2170             | 2                       | f   |
|       | 214                  | 22.9              | 18.2                     | 0                    | 110 / 60                                     | 0                                    | 15                           | /                      | 33 + 0                                                     | 39 + 0                                          | 42                       | vaginal                        | 2780             | 5                       | m   |
|       | 215                  | 25.0              | 23.6                     | 0                    | 134 / 71                                     | 0                                    | 0                            | /                      | 25 + 6                                                     | 40 + 1                                          | 100                      | s.c.                           | 2750             | 4                       | f   |

a) determined at beginning of hospitalization (time point of blood collection)

b) systolic/diastolic pressure

c) immunoturbidimetric assay (Tina-quant albumin; Roche Diagnostics. Mannheim, Germany); proteinuria is defined as urinary protein excretion >300 mg/L

d) dip stick assay; significant protein is present with readings of more than +1 (max: +3)

e) amount of cigarettes per day

f) preeclampsia

g) w: week, d: day

h)  $\Delta d$ : time difference between blood sample collection and delivery in days

i) s.c.: sectio caesarea

j) spectra not used for biostatistical analyses

**Supplemental Table 2: Areas of ion signals selected for scoring.**

| clinical diagnosis | patient ID        | measurement <sup>a,b)</sup> | areas of ion signals (m/z) |                                     |                           |                                     |                                    |
|--------------------|-------------------|-----------------------------|----------------------------|-------------------------------------|---------------------------|-------------------------------------|------------------------------------|
|                    |                   |                             | apo CII <sup>c)</sup>      | apo CIII <sub>0</sub> <sup>c)</sup> | pro-apo CII <sup>c)</sup> | apo CIII <sub>1</sub> <sup>c)</sup> | apoCIII <sub>2</sub> <sup>c)</sup> |
|                    |                   |                             | 8205 <sup>d)</sup>         | 8766 <sup>d)</sup>                  | 8916 <sup>d)</sup>        | 9422 <sup>d)</sup>                  | 9713 <sup>d)</sup>                 |
| CTRL               | 101               | MS1                         | 414.30                     | 200.24                              | 883.56                    | 2074.71                             | 539.74                             |
| CTRL               | 101               | MS2                         | 400.35                     | 206.89                              | 841.79                    | 2383.00                             | 622.14                             |
| CTRL               | 102               | MS1                         | 698.00                     | 150.34                              | 1247.64                   | 1569.02                             | 681.66                             |
| CTRL               | 102               | MS2                         | 705.71                     | 133.29                              | 1264.78                   | 1534.71                             | 652.39                             |
| CTRL               | 103               | MS1                         | 421.90                     | 107.80                              | 921.31                    | 1840.63                             | 402.83                             |
| CTRL               | 103               | MS2                         | 457.38                     | 105.68                              | 1019.10                   | 1990.28                             | 489.84                             |
| CTRL               | 104               | MS1                         | 264.59                     | 116.04                              | 961.72                    | 2034.77                             | 467.03                             |
| CTRL               | 104               | MS2                         | 178.14                     | 106.47                              | 658.71                    | 1933.72                             | 420.97                             |
| CTRL               | 105               | MS1                         | 500.00                     | 156.60                              | 977.96                    | 2285.33                             | 593.77                             |
| CTRL               | 105               | MS2                         | 464.62                     | 141.43                              | 920.55                    | 2197.40                             | 587.02                             |
| CTRL               | 106               | MS1                         | 222.37                     | 126.91                              | 791.88                    | 1778.87                             | 394.30                             |
| CTRL               | 106               | MS2                         | 213.55                     | 143.11                              | 763.30                    | 1885.79                             | 430.03                             |
| CTRL               | 107               | MS1                         | 438.96                     | 159.81                              | 970.72                    | 2400.46                             | 409.66                             |
| CTRL               | 107               | MS2                         | 475.35                     | 127.37                              | 939.19                    | 2109.18                             | 364.65                             |
| CTRL               | 108               | MS1                         | 377.30                     | 232.00                              | 727.85                    | 2564.50                             | 554.57                             |
| CTRL               | 108               | MS2                         | 383.90                     | 203.30                              | 684.85                    | 2141.79                             | 398.44                             |
| CTRL               | 109               | MS1                         | 329.15                     | 106.16                              | 911.18                    | 1942.23                             | 492.75                             |
| CTRL               | 109               | MS2                         | 325.66                     | 108.23                              | 917.82                    | 1948.87                             | 509.50                             |
| CTRL               | 110               | MS1                         | 390.37                     | 281.28                              | 982.85                    | 1860.78                             | 523.74                             |
| CTRL               | 110               | MS2                         | 380.13                     | 265.66                              | 907.92                    | 1739.45                             | 446.88                             |
| CTRL               | 111               | MS1                         | 238.20                     | 102.48                              | 886.59                    | 1953.43                             | 479.76                             |
| CTRL               | 111               | MS2                         | 251.44                     | 101.71                              | 936.77                    | 2040.18                             | 482.76                             |
| CTRL               | 112               | MS1                         | 312.80                     | 238.63                              | 967.43                    | 2128.26                             | 439.25                             |
| CTRL               | 112               | MS2                         | 324.25                     | 234.88                              | 974.10                    | 2150.88                             | 464.01                             |
| CTRL               | 113               | MS1                         | 254.58                     | 278.50                              | 1027.06                   | 2026.04                             | 427.75                             |
| CTRL               | 113               | MS2                         | 281.71                     | 292.17                              | 1106.54                   | 2132.15                             | 461.05                             |
| CTRL               | 114               | MS1                         | 144.47                     | 182.59                              | 589.61                    | 1461.07                             | 320.83                             |
| CTRL               | 114               | MS2                         | 152.05                     | 178.65                              | 584.65                    | 1455.51                             | 327.33                             |
| CTRL               | 115 <sup>e)</sup> | MS1                         | 281.34                     | 14.20                               | 1167.01                   | 1110.15                             | 413.78                             |
| CTRL               | 115 <sup>e)</sup> | MS2                         | 231.69                     | 18.74                               | 937.52                    | 977.23                              | 402.52                             |
| SGA                | 201               | MS1                         | 215.62                     | 270.94                              | 789.79                    | 1330.84                             | 339.23                             |
| SGA                | 201               | MS2                         | 263.98                     | 460.72                              | 1037.82                   | 2435.07                             | 655.13                             |
| SGA                | 202               | MS1                         | 732.59                     | 93.49                               | 876.16                    | 2469.79                             | 564.72                             |
| SGA                | 202               | MS2                         | 654.59                     | 91.84                               | 769.69                    | 2215.84                             | 510.94                             |
| SGA                | 203               | MS1                         | 233.77                     | 141.40                              | 1082.29                   | 2776.67                             | 526.12                             |
| SGA                | 203               | MS2                         | 233.77                     | 141.40                              | 1082.29                   | 2776.67                             | 526.12                             |
| SGA                | 204               | MS1                         | 306.25                     | 262.94                              | 937.48                    | 2267.95                             | 442.92                             |
| SGA                | 204               | MS2                         | 273.12                     | 283.39                              | 844.56                    | 2332.37                             | 435.84                             |
| SGA                | 205               | MS1                         | 292.18                     | 456.29                              | 907.95                    | 2217.01                             | 629.64                             |
| SGA                | 205               | MS2                         | 217.11                     | 399.58                              | 691.47                    | 1921.16                             | 582.48                             |
| SGA                | 206               | MS1                         | 411.65                     | 128.55                              | 977.60                    | 1703.53                             | 552.24                             |
| SGA                | 206               | MS2                         | 433.39                     | 131.13                              | 1017.58                   | 1770.33                             | 649.78                             |
| SGA                | 207               | MS1                         | 520.37                     | 184.78                              | 1227.13                   | 2247.78                             | 404.80                             |
| SGA                | 207               | MS2                         | 523.52                     | 165.27                              | 1260.87                   | 2034.50                             | 375.76                             |
| SGA                | 208               | MS1                         | 120.34                     | 99.83                               | 679.65                    | 1608.17                             | 595.25                             |
| SGA                | 208               | MS2                         | 118.43                     | 99.81                               | 704.81                    | 1762.08                             | 614.28                             |
| SGA                | 209               | MS1                         | 483.31                     | 80.24                               | 908.62                    | 1778.71                             | 437.86                             |
| SGA                | 209               | MS2                         | 504.72                     | 76.05                               | 897.84                    | 1826.20                             | 476.90                             |

**Supplemental Table 2** (continued)

| clinical diagnosis | patient ID        | measurement <sup>a,b)</sup> | areas of ion signals (m/z) |                                     |                           |                                     |                                    |
|--------------------|-------------------|-----------------------------|----------------------------|-------------------------------------|---------------------------|-------------------------------------|------------------------------------|
|                    |                   |                             | apo CII <sup>c)</sup>      | apo CIII <sub>0</sub> <sup>c)</sup> | pro-apo CII <sup>c)</sup> | apo CIII <sub>1</sub> <sup>c)</sup> | apoCIII <sub>2</sub> <sup>c)</sup> |
|                    |                   |                             | 8205 <sup>d)</sup>         | 8766 <sup>d)</sup>                  | 8916 <sup>d)</sup>        | 9422 <sup>d)</sup>                  | 9713 <sup>d)</sup>                 |
| SGA                | 210               | MS1                         | 197.06                     | 132.67                              | 787.89                    | 2419.87                             | 418.73                             |
| SGA                | 210               | MS2                         | 168.81                     | 124.32                              | 679.19                    | 2021.89                             | 317.82                             |
| SGA                | 211               | MS1                         | 201.32                     | 157.10                              | 892.48                    | 1903.22                             | 420.12                             |
| SGA                | 211               | MS2                         | 170.87                     | 130.35                              | 781.20                    | 1517.58                             | 330.60                             |
| SGA                | 212               | MS1                         | 239.09                     | 225.91                              | 637.04                    | 1840.71                             | 497.30                             |
| SGA                | 212               | MS2                         | 293.11                     | 217.61                              | 766.70                    | 1913.29                             | 524.41                             |
| SGA                | 213               | MS1                         | 319.36                     | 281.63                              | 1057.62                   | 2544.11                             | 496.54                             |
| SGA                | 213               | MS2                         | 243.79                     | 227.11                              | 829.42                    | 2215.08                             | 422.14                             |
| SGA                | 214               | MS1                         | 464.05                     | 152.31                              | 979.33                    | 2000.95                             | 519.80                             |
| SGA                | 214               | MS2                         | 540.68                     | 150.61                              | 1129.53                   | 2173.92                             | 608.80                             |
| SGA                | 215               | MS1                         | 107.24                     | 122.08                              | 636.23                    | 1336.81                             | 363.48                             |
| SGA                | 215               | MS2                         | 157.04                     | 130.62                              | 883.08                    | 1777.3                              | 520.11                             |
| IUGR               | 301               | MS1                         | 192.37                     | 235.80                              | 825.99                    | 2279.91                             | 404.18                             |
| IUGR               | 301               | MS2                         | 194.27                     | 245.49                              | 853.32                    | 2481.24                             | 441.21                             |
| IUGR               | 302               | MS1                         | 567.62                     | 81.83                               | 1174.89                   | 2088.35                             | 639.09                             |
| IUGR               | 302               | MS2                         | 659.08                     | 102.29                              | 1320.98                   | 2364.86                             | 635.10                             |
| IUGR               | 303               | MS1                         | 364.36                     | 220.96                              | 1245.24                   | 2128.28                             | 554.69                             |
| IUGR               | 303               | MS2                         | 352.85                     | 225.31                              | 1252.01                   | 2323.04                             | 618.43                             |
| IUGR               | 304               | MS1                         | 304.41                     | 132.04                              | 1112.63                   | 1861.06                             | 375.89                             |
| IUGR               | 304               | MS2                         | 263.48                     | 123.54                              | 940.25                    | 1765.63                             | 404.76                             |
| IUGR               | 305               | MS1                         | 217.45                     | 163.06                              | 1083.87                   | 1687.21                             | 452.45                             |
| IUGR               | 305               | MS2                         | 236.67                     | 147.27                              | 1180.20                   | 1695.96                             | 457.25                             |
| IUGR               | 306               | MS1                         | 220.31                     | 122.83                              | 1070.73                   | 1806.31                             | 430.47                             |
| IUGR               | 306               | MS2                         | 232.44                     | 126.49                              | 1215.18                   | 1946.77                             | 444.06                             |
| IUGR               | 307               | MS1                         | 213.23                     | 399.97                              | 1071.57                   | 2112.83                             | 424.41                             |
| IUGR               | 307               | MS2                         | 139.88                     | 343.33                              | 671.93                    | 1850.29                             | 389.32                             |
| IUGR               | 308               | MS1                         | 212.31                     | 130.90                              | 929.72                    | 1175.19                             | 592.87                             |
| IUGR               | 308               | MS2                         | 201.66                     | 129.91                              | 856.22                    | 1109.21                             | 598.61                             |
| IUGR               | 309               | MS1                         | 239.50                     | 166.24                              | 1135.39                   | 1948.42                             | 395.73                             |
| IUGR               | 309               | MS2                         | 233.65                     | 134.17                              | 1094.62                   | 1505.65                             | 308.34                             |
| IUGR               | 310               | MS1                         | 418.20                     | 97.19                               | 934.46                    | 1417.34                             | 383.97                             |
| IUGR               | 310               | MS2                         | 484.28                     | 88.89                               | 1051.94                   | 1347.04                             | 307.99                             |
| IUGR               | 311               | MS1                         | 262.66                     | 99.87                               | 937.06                    | 1606.35                             | 339.85                             |
| IUGR               | 311               | MS2                         | 263.28                     | 99.37                               | 958.19                    | 1638.39                             | 353.77                             |
| IUGR               | 312               | MS1                         | 477.13                     | 145.12                              | 1254.09                   | 1709.73                             | 469.29                             |
| IUGR               | 312               | MS2                         | 480.48                     | 142.78                              | 1233.48                   | 1666.21                             | 433.14                             |
| IUGR               | 313               | MS1                         | 180.27                     | 183.17                              | 1029.00                   | 1663.82                             | 331.00                             |
| IUGR               | 313               | MS2                         | 191.68                     | 186.87                              | 1156.24                   | 1830.70                             | 396.27                             |
| IUGR               | 314               | MS1                         | 293.84                     | 105.08                              | 924.29                    | 1241.76                             | 235.34                             |
| IUGR               | 314               | MS2                         | 434.38                     | 124.61                              | 1449.40                   | 1512.45                             | 269.20                             |
| IUGR               | 315 <sup>e)</sup> | MS1                         | n.d.                       | n.d.                                | n.d.                      | n.d.                                | n.d.                               |
| IUGR               | 315 <sup>e)</sup> | MS2                         | n.d.                       | n.d.                                | n.d.                      | n.d.                                | n.d.                               |

a) MS1: first measurement of ClinProt work-up, ("training set").

b) MS2: second measurement of ClinProt work-up, ("test set").

c) abbreviated protein name

d) m/z value in MALDI mass spectrum

e) n.d.: ion signal areas not determined

**Supplemental Table 3:** Determination of Youden Index (J<sub>max</sub>) for Quotient A.

| patient ID | clinical diagnosis | quotient A <sup>a)</sup> | test cut-off | below cut-off | above cut-off | TP <sup>b)</sup> | FP <sup>b)</sup> | TN <sup>b)</sup> | FN <sup>b)</sup> | sensitivity | specificity | J <sup>c)</sup> |
|------------|--------------------|--------------------------|--------------|---------------|---------------|------------------|------------------|------------------|------------------|-------------|-------------|-----------------|
|            | min                | 0.8                      |              |               |               |                  |                  |                  |                  |             |             |                 |
| 102        | CTRL               | 1.8                      | 1.3          | 0             | 28            | 14               | 14               | 0                | 0                | 1.00        | 0.00        | 0.00            |
| 108        | CTRL               | 1.9                      | 1.9          | 1             | 27            | 14               | 13               | 1                | 0                | 1.00        | 0.07        | 0.07            |
| 105        | CTRL               | 2.0                      | 1.9          | 2             | 26            | 14               | 12               | 2                | 0                | 1.00        | 0.14        | 0.14            |
| 302        | IUGR               | 2.1                      | 2.0          | 3             | 25            | 14               | 11               | 3                | 0                | 1.00        | 0.21        | 0.21            |
| 101        | CTRL               | 2.1                      | 2.1          | 4             | 24            | 13               | 11               | 3                | 1                | 0.93        | 0.21        | 0.14            |
| 103        | CTRL               | 2.2                      | 2.2          | 5             | 23            | 13               | 10               | 4                | 1                | 0.93        | 0.29        | 0.21            |
| 107        | CTRL               | 2.2                      | 2.2          | 6             | 22            | 13               | 9                | 5                | 1                | 0.93        | 0.36        | 0.29            |
| 310        | IUGR               | 2.2                      | 2.2          | 7             | 21            | 13               | 8                | 6                | 1                | 0.93        | 0.43        | 0.36            |
| 110        | CTRL               | 2.5                      | 2.4          | 8             | 20            | 12               | 8                | 6                | 2                | 0.86        | 0.43        | 0.29            |
| 312        | IUGR               | 2.6                      | 2.6          | 9             | 19            | 12               | 7                | 7                | 2                | 0.86        | 0.50        | 0.36            |
| 109        | CTRL               | 2.8                      | 2.7          | 10            | 18            | 11               | 7                | 7                | 3                | 0.79        | 0.50        | 0.29            |
| 112        | CTRL               | 3.1                      | 2.9          | 11            | 17            | 11               | 6                | 8                | 3                | 0.79        | 0.57        | 0.36            |
| 314        | IUGR               | 3.1                      | 3.1          | 12            | 16            | 11               | 5                | 9                | 3                | 0.79        | 0.64        | 0.43            |
| 303        | IUGR               | 3.4                      | 3.3          | 13            | 15            | 10               | 5                | 9                | 4                | 0.71        | 0.64        | 0.36            |
| 106        | CTRL               | 3.6                      | 3.5          | 14            | 14            | 9                | 5                | 9                | 5                | 0.64        | 0.64        | 0.29            |
| 311        | IUGR               | 3.6                      | 3.6          | 15            | 13            | 9                | 4                | 10               | 5                | 0.64        | 0.71        | 0.36            |
| 104        | CTRL               | 3.6                      | 3.6          | 16            | 12            | 8                | 4                | 10               | 6                | 0.57        | 0.71        | 0.29            |
| 304        | IUGR               | 3.7                      | 3.6          | 17            | 11            | 8                | 3                | 11               | 6                | 0.57        | 0.79        | 0.36            |
| 111        | CTRL               | 3.7                      | 3.7          | 18            | 10            | 7                | 3                | 11               | 7                | 0.50        | 0.79        | 0.29            |
| 113        | CTRL               | 4.0                      | 3.9          | 19            | 9             | 7                | 2                | 12               | 7                | 0.50        | 0.86        | 0.36            |
| 114        | CTRL               | 4.1                      | 4.1          | 20            | 8             | 7                | 1                | 13               | 7                | 0.50        | 0.93        | 0.43            |
| 301        | IUGR               | 4.3                      | <b>4.2</b>   | <b>21</b>     | <b>7</b>      | <b>7</b>         | <b>0</b>         | <b>14</b>        | <b>7</b>         | <b>0.50</b> | <b>1.00</b> | <b>0.50</b>     |
| 308        | IUGR               | 4.4                      | 4.3          | 22            | 6             | 6                | 0                | 14               | 8                | 0.43        | 1.00        | 0.43            |
| 309        | IUGR               | 4.7                      | 4.6          | 23            | 5             | 5                | 0                | 14               | 9                | 0.36        | 1.00        | 0.36            |
| 306        | IUGR               | 4.9                      | 4.8          | 24            | 4             | 4                | 0                | 14               | 10               | 0.29        | 1.00        | 0.29            |
| 305        | IUGR               | 5.0                      | 4.9          | 25            | 3             | 3                | 0                | 14               | 11               | 0.21        | 1.00        | 0.21            |
| 307        | IUGR               | 5.0                      | 5.0          | 26            | 2             | 2                | 0                | 14               | 12               | 0.14        | 1.00        | 0.14            |
| 313        | IUGR               | 5.7                      | 5.4          | 27            | 1             | 1                | 0                | 14               | 13               | 0.07        | 1.00        | 0.07            |
|            | max                | 6.7                      | 6.2          | 28            | 0             | 0                | 0                | 14               | 14               | 0.00        | 1.00        | 0.00            |

a) ranking according to the values of quotients A after adjoining theoretical minimum and maximum values

b) FN = false negative, FP = false positive, TN = true negative, TP = true positive.

c) J=Youden index; bold print: J<sub>max</sub>

**Supplemental Table 4:** Determination of Youden Index (J<sub>max</sub>) for Quotient B.

| patient ID | clinical diagnosis | quotient B <sup>a)</sup> | test cut-off | below cut-off | above cut-off | TP <sup>b)</sup> | FP <sup>b)</sup> | TN <sup>b)</sup> | FN <sup>b)</sup> | sensitivity | specificity | J <sup>c)</sup> |
|------------|--------------------|--------------------------|--------------|---------------|---------------|------------------|------------------|------------------|------------------|-------------|-------------|-----------------|
|            | min                | 2.0                      |              |               |               |                  |                  |                  |                  |             |             |                 |
| 302        | IUGR               | 3.0                      | 2.5          | 0             | 28            | 14               | 14               | 0                | 0                | 1.00        | 0.00        | 0.00            |
| 111        | CTRL               | 4.2                      | 3.6          | 1             | 27            | 13               | 14               | 0                | 1                | 0.93        | 0.00        | -0.07           |
| 109        | CTRL               | 4.4                      | 4.3          | 2             | 26            | 13               | 13               | 1                | 1                | 0.93        | 0.07        | 0.00            |
| 104        | CTRL               | 4.6                      | 4.5          | 3             | 25            | 13               | 12               | 2                | 1                | 0.93        | 0.14        | 0.07            |
| 103        | CTRL               | 4.8                      | 4.7          | 4             | 24            | 13               | 11               | 3                | 1                | 0.93        | 0.21        | 0.14            |
| 311        | IUGR               | 5.1                      | <b>5.0</b>   | <b>5</b>      | <b>23</b>     | <b>13</b>        | <b>10</b>        | <b>4</b>         | <b>1</b>         | <b>0.93</b> | <b>0.29</b> | <b>0.21</b>     |
| 310        | IUGR               | 5.4                      | 5.3          | 6             | 22            | 12               | 10               | 4                | 2                | 0.86        | 0.29        | 0.14            |
| 105        | CTRL               | 5.4                      | 5.4          | 7             | 21            | 11               | 10               | 4                | 3                | 0.79        | 0.29        | 0.07            |
| 306        | IUGR               | 5.5                      | 5.5          | 8             | 20            | 11               | 9                | 5                | 3                | 0.79        | 0.36        | 0.14            |
| 107        | CTRL               | 5.7                      | 5.6          | 9             | 19            | 10               | 9                | 5                | 4                | 0.71        | 0.36        | 0.07            |
| 106        | CTRL               | 5.8                      | 5.8          | 10            | 18            | 10               | 8                | 6                | 4                | 0.71        | 0.43        | 0.14            |
| 304        | IUGR               | 5.9                      | 5.9          | 11            | 17            | 10               | 7                | 7                | 4                | 0.71        | 0.50        | 0.21            |
| 312        | IUGR               | 6.7                      | 6.3          | 12            | 16            | 9                | 7                | 7                | 5                | 0.64        | 0.50        | 0.14            |
| 102        | CTRL               | 6.7                      | 6.7          | 13            | 15            | 8                | 7                | 7                | 6                | 0.57        | 0.50        | 0.07            |
| 309        | IUGR               | 7.1                      | 6.9          | 14            | 14            | 8                | 6                | 8                | 6                | 0.57        | 0.57        | 0.14            |
| 314        | IUGR               | 7.1                      | 7.1          | 15            | 13            | 7                | 6                | 8                | 7                | 0.50        | 0.57        | 0.07            |
| 308        | IUGR               | 7.4                      | 7.3          | 16            | 12            | 6                | 6                | 8                | 8                | 0.43        | 0.57        | 0.00            |
| 108        | CTRL               | 7.4                      | 7.4          | 17            | 11            | 5                | 6                | 8                | 9                | 0.36        | 0.57        | -0.07           |
| 305        | IUGR               | 7.6                      | 7.5          | 18            | 10            | 5                | 5                | 9                | 9                | 0.36        | 0.64        | 0.00            |
| 101        | CTRL               | 7.7                      | 7.6          | 19            | 9             | 4                | 5                | 9                | 10               | 0.29        | 0.64        | -0.07           |
| 303        | IUGR               | 8.2                      | 7.9          | 20            | 8             | 4                | 4                | 10               | 10               | 0.29        | 0.71        | 0.00            |
| 301        | IUGR               | 8.8                      | 8.5          | 21            | 7             | 3                | 4                | 10               | 11               | 0.21        | 0.71        | -0.07           |
| 313        | IUGR               | 9.2                      | 9.0          | 22            | 6             | 2                | 4                | 10               | 12               | 0.14        | 0.71        | -0.14           |
| 112        | CTRL               | 9.3                      | 9.2          | 23            | 5             | 1                | 4                | 10               | 13               | 0.07        | 0.71        | -0.21           |
| 114        | CTRL               | 10.2                     | 9.8          | 24            | 4             | 1                | 3                | 11               | 13               | 0.07        | 0.79        | -0.14           |
| 113        | CTRL               | 11.3                     | 10.8         | 25            | 3             | 1                | 2                | 12               | 13               | 0.07        | 0.86        | -0.07           |
| 110        | CTRL               | 11.8                     | 11.6         | 26            | 2             | 1                | 1                | 13               | 13               | 0.07        | 0.93        | 0.00            |
| 307        | IUGR               | 15.8                     | 13.8         | 27            | 1             | 1                | 0                | 14               | 13               | 0.07        | 1.00        | 0.07            |
|            | max                | 16.8                     | 16.3         | 28            | 0             | 0                | 0                | 14               | 14               | 0.00        | 1.00        | 0.00            |

a) ranking according to the values of quotients A after adjoining theoretical minimum and maximum values

b) FN = false negative, FP = false positive, TN = true negative, TP = true positive.

c) J=Youden index; bold print: J<sub>max</sub>



**Supplemental Table 5: Determination of Youden Index (J<sub>max</sub>) for Quotient C.**

| patient ID | clinical diagnosis | quotient C <sup>a)</sup> | test cut-off | below cut-off | above cut-off | TP <sup>b)</sup> | FP <sup>b)</sup> | TN <sup>b)</sup> | FN <sup>b)</sup> | sensitivity | specificity | J <sup>c)</sup> |
|------------|--------------------|--------------------------|--------------|---------------|---------------|------------------|------------------|------------------|------------------|-------------|-------------|-----------------|
|            | min                | 1.2                      |              |               |               |                  |                  |                  |                  |             |             |                 |
| 108        | CTRL               | 2.2                      | 1.7          | 0             | 28            | 14               | 14               | 0                | 0                | 1.00        | 0.00        | 0.00            |
| 301        | IUGR               | 2.8                      | 2.5          | 1             | 27            | 14               | 13               | 1                | 0                | 1.00        | 0.07        | 0.07            |
| 114        | CTRL               | 3.0                      | 2.9          | 2             | 26            | 13               | 13               | 1                | 1                | 0.93        | 0.07        | 0.00            |
| 101        | CTRL               | 3.1                      | 3.1          | 3             | 25            | 13               | 12               | 2                | 1                | 0.93        | 0.14        | 0.07            |
| 105        | CTRL               | 3.2                      | 3.2          | 4             | 24            | 13               | 11               | 3                | 1                | 0.93        | 0.21        | 0.14            |
| 107        | CTRL               | 3.3                      | 3.3          | 5             | 23            | 13               | 10               | 4                | 1                | 0.93        | 0.29        | 0.21            |
| 106        | CTRL               | 3.4                      | 3.4          | 6             | 22            | 13               | 9                | 5                | 1                | 0.93        | 0.36        | 0.29            |
| 112        | CTRL               | 3.4                      | 3.5          | 7             | 21            | 13               | 8                | 6                | 1                | 0.93        | 0.43        | 0.36            |
| 111        | CTRL               | 3.5                      | 3.5          | 8             | 20            | 13               | 7                | 7                | 1                | 0.93        | 0.50        | 0.43            |
| 109        | CTRL               | 3.6                      | 3.5          | 9             | 19            | 13               | 6                | 8                | 1                | 0.93        | 0.57        | 0.50            |
| 307        | IUGR               | 3.6                      | 3.6          | 10            | 18            | 13               | 5                | 9                | 1                | 0.93        | 0.64        | 0.57            |
| 104        | CTRL               | 3.7                      | 3.7          | 11            | 17            | 12               | 5                | 9                | 2                | 0.86        | 0.64        | 0.50            |
| 110        | CTRL               | 3.7                      | 3.7          | 12            | 16            | 12               | 4                | 10               | 2                | 0.86        | 0.71        | 0.57            |
| 113        | CTRL               | 3.8                      | 3.7          | 13            | 15            | 12               | 3                | 11               | 2                | 0.86        | 0.79        | 0.64            |
| 103        | CTRL               | 3.9                      | 3.8          | 14            | 14            | 12               | 2                | 12               | 2                | 0.86        | 0.86        | 0.71            |
| 302        | IUGR               | 4.2                      | <b>4.0</b>   | <b>15</b>     | <b>13</b>     | <b>12</b>        | <b>1</b>         | <b>13</b>        | <b>2</b>         | <b>0.86</b> | <b>0.93</b> | <b>0.79</b>     |
| 303        | IUGR               | 4.3                      | 4.2          | 16            | 12            | 11               | 1                | 13               | 3                | 0.79        | 0.93        | 0.71            |
| 309        | IUGR               | 4.5                      | 4.4          | 17            | 11            | 10               | 1                | 13               | 4                | 0.71        | 0.93        | 0.64            |
| 306        | IUGR               | 4.5                      | 4.5          | 18            | 10            | 9                | 1                | 13               | 5                | 0.64        | 0.93        | 0.57            |
| 311        | IUGR               | 4.6                      | 4.6          | 19            | 9             | 8                | 1                | 13               | 6                | 0.57        | 0.93        | 0.50            |
| 304        | IUGR               | 4.7                      | 4.6          | 20            | 8             | 7                | 1                | 13               | 7                | 0.50        | 0.93        | 0.43            |
| 305        | IUGR               | 4.7                      | 4.7          | 21            | 7             | 6                | 1                | 13               | 8                | 0.43        | 0.93        | 0.36            |
| 313        | IUGR               | 4.7                      | 4.7          | 22            | 6             | 5                | 1                | 13               | 9                | 0.36        | 0.93        | 0.29            |
| 308        | IUGR               | 4.9                      | 4.8          | 23            | 5             | 4                | 1                | 13               | 10               | 0.29        | 0.93        | 0.21            |
| 310        | IUGR               | 4.9                      | 4.9          | 24            | 4             | 3                | 1                | 13               | 11               | 0.21        | 0.93        | 0.14            |
| 102        | CTRL               | 5.2                      | 5.1          | 25            | 3             | 2                | 1                | 13               | 12               | 0.14        | 0.93        | 0.07            |
| 312        | IUGR               | 5.4                      | 5.3          | 26            | 2             | 2                | 0                | 14               | 12               | 0.14        | 1.00        | 0.14            |
| 314        | IUGR               | 5.8                      | 5.6          | 27            | 1             | 1                | 0                | 14               | 13               | 0.07        | 1.00        | 0.07            |
|            | max                | 6.8                      | 6.3          | 28            | 0             | 0                | 0                | 14               | 14               | 0.00        | 1.00        | 0.00            |

a) ranking according to the values of quotients A after adjoining theoretical minimum and maximum values

b) FN = false negative, FP = false positive, TN = true negative, TP = true positive.

c) J=Youden index; bold print: J<sub>max</sub>

**Supplemental Table 6:** Power analysis of mass spectrometric ion signal-derived proteome profile series <sup>a)</sup>.

| no. | type of data set                                                                                                          | group    | mean | std dev. | required sample size | used sample size <sup>b)</sup> | type I error ( $\alpha$ ) | type II error ( $\beta$ ) | actual power |
|-----|---------------------------------------------------------------------------------------------------------------------------|----------|------|----------|----------------------|--------------------------------|---------------------------|---------------------------|--------------|
| 1   | <b>training “O”:</b> CTRL I vs FGR I<br>(CTRL I, n=14; FGR I, n=14) <sup>b)</sup>                                         | CTRL     | 0.79 | 0.58     | 3                    | 14                             | 0.05                      | 0.20                      | 0.81         |
|     |                                                                                                                           | FGR      | 2.29 | 0.61     | 3                    | 14                             |                           |                           |              |
| 2   | <b>“development” test:</b> CTRL I+II vs FGR I+II<br>(CTRL I+II, n=28; FGR I+II, n=29) <sup>c)</sup>                       | CTRL     | 0.91 | 0.75     | 9                    | 28                             | 0.05                      | 0.20                      | 0.83         |
|     |                                                                                                                           | FGR      | 1.82 | 0.67     | 9                    | 44                             |                           |                           |              |
| 3   | <b>“validation” test:</b> CTRL I+II and SGA I vs FGR I+II<br>(CTRL I+II, n=28; SGA I, n=14; FGR I+II, n=29) <sup>c)</sup> | CTRL+SGA | 0.93 | 0.65     | 5                    | 42                             | 0.05                      | 0.20                      | 0.81         |
|     |                                                                                                                           | FGR      | 2.15 | 0.63     | 5                    | 29                             |                           |                           |              |

a) cumulative score separator:  $>1$  = FGR;  $\leq 1$  = CTRL.

b) number of individuals

c) only via Jmax determined cut-off values: quotient A = 4.2; quotient B = 5.0; quotient C = 4.0.

d) combined cut-off values: quotient A = 4.2 and 3.4; quotient B = 5.0 and 7.0; quotient C = 4.0 and 5.1.
